# Supplementary material
Source: PubMed Central journal article supplement (PMC1180670)
Supplement: nar_33_13_4128__1.pdf [file nar_33_13_4128__1.pdf]

## Supplementary Material

**Supplementary Fig. s1: Expression and purification of recombinant *S. pombe* Translin.** The *S. pombe* Translin cDNA was cloned into pQE-31, a bacterial expression vector encoding an N-terminal hexahistidine Tag. The resulting expression construct was transfected into the *E. coli* host strain XL1-Blue. (A) Following induction with 2 mM IPTG, crude extracts of uninduced (UI) and induced (I) bacteria were electrophoresed in an SDS-12% polyacrylamide gel under reducing conditions and stained by Coomassie Blue. Horizontal arrowhead indicates the position of Translin. (B) The recombinant *S. pombe* Translin was purified on a Ni-agarose affinity column, as previously described (Jacob, E., et. al., (2004), *J.Mol.Biol.*, **344**, 939-950). Aliquots of the various fractions were electrophoresed on an SDS-12% polyacrylamide gel under reducing conditions and stained with Coomassie Blue. CE, crude extract; FT, flowthrough fraction; W1-W3, wash fractions; E, elution fraction.

**Supplementary Fig. s2: Growth curves of the *S. pombe* deletion mutants *tsn-* and *tsn-*, *trax-*, and of the parental wild-type (wt) strain.** Colonies of each of the three strains (wt: empty squares; *tsn-*: solid triangles; *tsn-*, *trax-*: solid circles) were grown on YES plates at 30°C for 3 days and then picked up and suspended at  $\sim 5 \times 10^5$  cells/ml in 20 ml of liquid YES medium. The cultures were grown for 24 hours at 30°C, at which time the cell density was determined by counting in a haemocytometer, and the cells were diluted into 20 ml of fresh YES medium at  $5 \times 10^5$  cells/ml. This procedure was repeated for 7 days. N=total number of cells at the specified day.

This experiment has been repeated three times. The data were normalized relative to the number of cells in day 1 and are presented as averages and standard deviations of log N vs. days. The growth curve of the *trax-* null strain was similar to that of the *tsn-* mutant (not shown).

**Conclusion:** A slight stimulation was observed in the growth of the double mutant *tsn-*, *trax-*. The stimulation in the growth of the single mutant *tsn-* was within the experimental error.

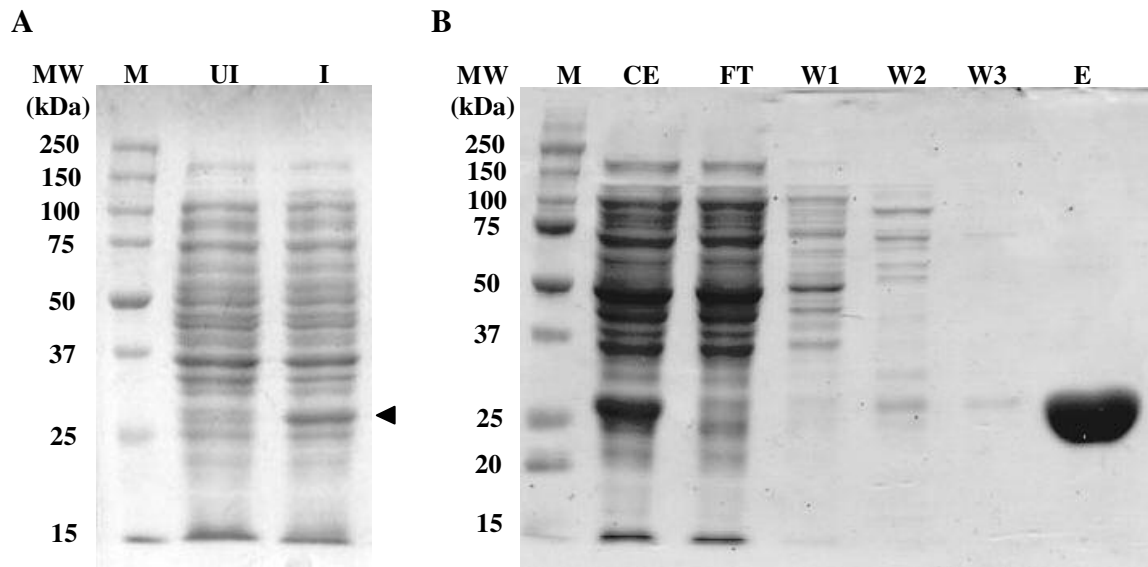

**FIGURE s1 (Laufman, et. al.)**

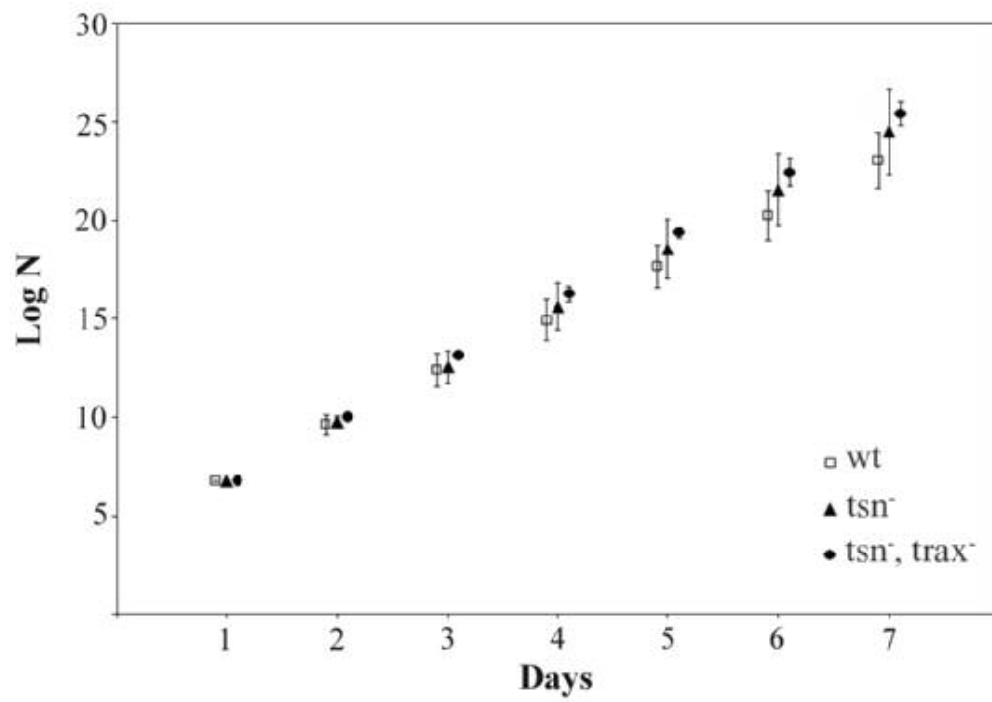

FIGURE s2 (Laufman, et. al.)
